# Supplementary material for: Karyotype Evolution and Genomic Organization of Repetitive DNAs in the Saffron Finch, Sicalis flaveola (Passeriformes, Aves)
Source: MDPI journal article supplement (doi:10.3390/ani11051456), 2021-05-19
Supplement: s1 [file s1]

Supplementary Table 2 - List of Passeriformes and Psittaciformes species analyzed with *Gallus gallus* (GGA) chromosome painting or BACs clones corresponding to GGA1-10.

| Species                        | Family         | 2n <sup>1</sup> | Fusions                                  | Fissions                              | References    |
|--------------------------------|----------------|-----------------|------------------------------------------|---------------------------------------|---------------|
| <b>Passeriformes</b>           |                |                 |                                          |                                       |               |
| <i>Conopophaga lineata</i>     | Conopophagidae | 78              | GGA2seg <sup>2</sup> /micro <sup>3</sup> | GGA1=CLI2 and 7<br>GGA2=CLI1 and 5    | [1]           |
| <i>Pica pica</i>               | Corvidae       | 76              | -                                        | GGA1=PPI3 and 4                       | [2]           |
| <i>Garrulus glandarius</i>     | Corvidae       | 78              | -                                        | GGA1=GGL2 and 4                       | [2]           |
| <i>Taeniopygia guttata</i>     | Estrildidae    | 80              | -                                        | GGA1=TGU2 and 5                       | [3]           |
| <i>Serinus canaria</i>         | Fringillidae   | 80              | -                                        | GGA1=SCA2 and 5                       | [3]           |
| <i>Fringilla coelebs</i>       | Fringillidae   | 80              | -                                        | GGA1=FCO3 and 4                       | [4]           |
| <i>Synallaxis frontalis</i>    | Furnariidae    | 82              | -                                        | GGA1=SFR1 and 5<br>GGA2=SFR3 and 7    | [5]           |
| <i>Glyphorynchus spirurus</i>  | Furnariidae    | 80              | -                                        | GGA1=GSP3 and 4<br>GGA2=GSP2 and 5    | [6]           |
| <i>Progne chalybea</i>         | Hirundinidae   | 76              | -                                        | GGA1=PCH2 and 5                       | [7]           |
| <i>Progne tapera</i>           | Hirundinidae   | 76              | -                                        | GGA1=PTA2 and 5                       | [7]           |
| <i>Pygochelidon cyanoleuca</i> | Hirundinidae   | 76              | GGA6/micro                               | GGA1=PCY2 and 5                       | [7]           |
| <i>Zonotrichia capensis</i>    | Passerellidae  | 80              | -                                        | GGA1=ZCA2 and 5                       | [8]           |
| <i>Parus major</i>             | Paridae        | 80              | -                                        | GGA1=PMA2 and 4                       | [2]           |
| <i>Periparus ater</i>          | Paridae        | 80              | -                                        | GGA1=PAT2 and 4                       | [2]           |
| <i>Sitta europaea</i>          | Sittidae       | 80              | GGA8/9=SEU7<br>GGA5/10=SEU6              | GGA1= SEU2 and 5<br>GGA5=SEU6q and 10 | [2]           |
| <i>Sylvia atricapilla</i>      | Sylviidae      | 74              | GGA4q/GGA4p=SAT5                         | GGA1=SAT2 and 4                       | [2]           |
| <i>Saltator aurantirostris</i> | Thraupidae     | 80              | -                                        | GGA1=SAU2 and 5                       | [9]           |
| <i>Saltator similis</i>        | Thraupidae     | 80              | -                                        | GGA1=SSI2 and 5                       | [9]           |
| <i>Sicalis flaveola</i>        | Thraupidae     | 80              | -                                        | GGA1=SFL2 and 4                       | Present study |
| <i>Turdus rufiventris</i>      | Turdidae       | 78              | -                                        | GGA1=TRU2 and 5                       | [10]          |
| <i>Turdus albicollis</i>       | Turdidae       | 78              | -                                        | GGA1=TAL2 and 5                       | [10]          |
| <i>Turdus iliacus</i>          | Turdidae       | 80              | -                                        | GGA1=TIL2 and 5                       | [4]           |

|                                   |               |       |                                                          |                                                           |      |
|-----------------------------------|---------------|-------|----------------------------------------------------------|-----------------------------------------------------------|------|
| <i>Turdus merula</i>              | Turdidae      | 80    | -                                                        | GGA1=TME2 and 5                                           | [11] |
| <i>Elaenia spectabilis</i>        | Tyrannidae    | 80    | -                                                        | GGA1=ESP2 and 5                                           | [12] |
| <i>Pitangus sulphuratus</i>       | Tyrannidae    | 80    | -                                                        | GGA1=PSU3 and 5                                           | [13] |
| <i>Serpophaga subcristata</i>     | Tyrannidae    | 82    | -                                                        | GGA1=SSU3 and 5                                           | [13] |
| <i>Satrapa icterophrys</i>        | Tyrannidae    | 82    | -                                                        | GGA1=SIC2 and 5                                           | [13] |
| <b>Psittaciformes</b>             |               |       |                                                          |                                                           |      |
| <i>Nymphicus hollandicus</i>      | Cacatuidae    | 72    | GGA6/7=NHO5<br>GGA4/8/9=NHO4                             | GGA1=NHO3 and 6<br>GGA9=NHO4p and 10                      | [14] |
| <i>Ara chloropterus</i>           | Psittacidae   | 70    | GGA1seg/4q=ACH1<br>GGA6/7=ACH6<br>GGA8/9=ACH7            | GGA1=ACH1q and 4<br>GGA2=ACH2 and 11                      | [15] |
| <i>Anodorhynchus hyacinthinus</i> | Psittacidae   | 70    | GGA1seg/4q=AHY1<br>GGA6/7=AHY6<br>GGA8/9=AHY7            | GGA1=AHY1q and 4                                          | [15] |
| <i>Psittacus erithacus</i>        | Psittacidae   | 62-64 | GGA1seg/4=PER1<br>GGA6/7=PER6<br>GGA8/9=PER7             | GGA1=PER1q and 4                                          | [16] |
| <i>Ara macaw</i>                  | Psittacidae   | 62-64 | GGA1seg/4q=AMA1<br>GGA6/7=AMA6<br>GGA8/9=AMA7            | GGA1=AMA1, 4, and 9                                       | [17] |
| <i>Pyrrhura frontalis</i>         | Psittacidae   | 70    | GGA1q/4=PFR1<br>GGA6/7=PFR6                              | GGA1=PFR1q and 4                                          | [18] |
| <i>Amazona aestiva</i>            | Psittacidae   | 70    | GGA6/7=AAE7                                              | GGA1=AAE2 and 5<br>GGA2=AAE1 and 12                       | [18] |
| <i>Agapornis roseicollis</i>      | Psittaculidae | 48    | GGA6/7=ARO6<br>GGA1/4=ARO4<br>GGA8/9=ARO5<br>GGA2/9=ARO9 | GGA1=ARO3 and 4q<br>GGA2=ARO2 and 9q<br>GGA9=ARO5q and 9q | [14] |
| <i>Melopsittacus undulatus</i>    | Psittaculidae | 62    | GGA5/6/7=MUN4<br>GGA4/8/9=MUN5                           | GGA1=MUN3 and 6<br>GGA6=MUN4p and 8p                      | [14] |

<sup>1</sup> Diploid number, <sup>2</sup> segment, and <sup>3</sup> microchromosome. The data of *Myiopsitta monachus* (Psittaciformes) were not compared here because the exact fusions involving chromosomes GGA10, 11, and 12 were not identified, since a flow sorted peak including the chromosomes GGA10, 11, and 12 was used [19]. The data of *Willisornis vidua* (Passeriformes) were not compared here because the authors reported several interchromosomal rearrangements in this species, however, the exact rearrangements were not described [20].

## References

1. de Oliveira, T.D.; Kretschmer, R.; Bertocchi, N.A.; O'Brien, P.C.M.; Ferguson-Smith, M.A.; Garnero, A.D.V.; de Oliveira, E.H.C.; Gunski, R.J. The molecular cytogenetic characterization of *Conopophaga lineata* indicates a common chromosome rearrangement in the Parvorder Furnariida (Aves, Passeriformes). *Genet. Mol. Biol.* **2020**, *43*, e20200018. doi: 10.1590/1678-4685-gmb-2020-0018
2. Nanda, I.; Benisch, P.; Fetting, D.; Haaf, T.; Schmid, M. Synteny conservation of chicken macrochromosomes 1-10 in different avian lineages revealed by cross-species chromosome painting. *Cytogenet. Genome Res.* **2011**, *132*, 165–181. doi: 10.1159/000322358
3. dos Santos, M.S.; Kretschmer, R.; Frankl-Vilches, C.; Bakker, A.; Gahr, M.; O'Brien, P.C.M.; Ferguson-Smith, M.A.; de Oliveira, E.H.C. Comparative cytogenetics between two important songbird, models: The zebra finch and the canary. *PLoS One* **2017**, *12*, e0170997. doi: 10.1371/journal.pone.0170997
4. Derjusheva, S.; Kurganova, A.; Habermann, F.; Gaginskaya, E. High chromosome conservation detected by comparative chromosome painting in chicken, pigeon and passerine birds. *Chromosome Res.* **2004**, *12*, 715–723. doi: 10.1023/B:CHRO.0000045779.50641.00
5. Kretschmer, R.; de Lima, V.L.C.; de Souza, M.S.; Costa, A.L.; O'Brien, P.C.M.; Ferguson-Smith, M.A.; de Oliveira, E.H.C.; Gunski, R.J.; Garnero, A.D.V. Multidirectional chromosome painting in *Synallaxis frontalis* (Passeriformes, Furnariidae) reveals high chromosomal reorganization, involving fissions and inversions. *Comp. Cytogenet.* **2018**, *12*, 97–110. doi: 10.3897/CompCytogen.v12i1.22344
6. Ribas, T.F.A.; Nagamachi, C.Y.; Aleixo, A.; Pinheiro, M.L.S.; O'Brien, P.C.M.; Ferguson-Smith, M.A.; Yang, F.; Suarez, P.; Pieczarka, J.C. Chromosome painting in *Glyphorhynchus spirurus* (Vieillot, 1819) detects a new fission in Passeriformes. *PLoS One* **2018**, *13*, e0202040. doi: 10.1371/journal.pone.0202040
7. Barcellos, S.; Kretschmer, R.; de Souza, M.S.; Costa, A.L.; Degrandi, T.M.; dos Santos, M.S.; de Oliveira, E.H.C.; Cioffi, M.B.; Gunski, R.J.; Garnero, A.V. Karyotype Evolution and Distinct Evolutionary History of the W Chromosomes in Swallows (Aves, Passeriformes). *Cytogenet. Genome Res.* **2019**, *158*, 98–105. doi: 10.1159/000500621
8. Bürlau, S.E.; Kretschmer, R.; Gunski, R.J.; Garnero, A.D.V.; O'Brien, P.C.M.; Ferguson-Smith, M.A.; de Oliveira, E.H.C.; de Freitas, T.R.O. Chromosomal polymorphism and comparative chromosome painting in the rufous-collared sparrow (*Zonotrichia capensis*). *Genet. Mol. Biol.* **2018**, *41*, 799–805. doi: 10.1590/1678-4685-gmb-2017-0367
9. dos Santos, M.S.; Kretschmer, R.; Silva, F.A.O.; Ledesma, M.A.; O'Brien, P.C.M.; Ferguson-Smith, M.A.; Garnero, A.D.V.; de Oliveira, E.H.C.; Gunski, R.J. Intrachromosomal rearrangements in two representatives of the genus *Saltator* (Thraupidae, Passeriformes) and the occurrence of heteromorphic Z chromosomes. *Genetica* **2015**, *143*, 535–543. doi: 10.1007/s10709-015-9851-4
10. Kretschmer, R.; Gunski, R.J.; Garnero, A.D.V.; Furo, I.O.; O'Brien, P.C.M.; Ferguson-Smith, M.A.; de Oliveira, E.H.C. Molecular cytogenetic characterization of multiple intrachromosomal rearrangements in two representatives of the genus *Turdus* (Turdidae, Passeriformes). *PLoS One* **2014**, *9*, e103338. doi: 10.1371/journal.pone.0103338
11. Guttenbach, M.; Nanda, I.; Feichtinger, W.; Masabanda, J.S.; Griffin, D.K.; Schmid, M. Comparative chromosome painting of chicken autosomal paints 1–9 in nine different bird species. *Cytogenet. Genome Res.* **2003**, *103*, 173–184. doi: 10.1159/000076309
12. Kretschmer, R.; de Oliveira, E.H.C.; dos Santos, M.S.; Furo, I.O.; O'Brien, P.C.M.; Ferguson-Smith, M.A.; Garnero, A.D.V.; Gunski, R.J. Chromosome mapping of the large elaeina (*Elaenia spectabilis*): Evidence for a cytogenetic signature for passeriform birds? *Biol. J. Linn. Soc.* **2015**, *115*, 391–398. doi: 10.1111/bij.12504
13. Rodrigues, B.S.; Kretschmer, R.; Gunski, R.J.; Garnero, A.D.V.; O'Brien, P.C.M.; Ferguson-Smith, M.A.; de Oliveira, E.H.C. Chromosome Painting in Tyrant Flycatchers Confirms a Set of Inversions Shared by Oscines and Suboscines (Aves, Passeriformes). *Cytogenet. Genome Res.* **2018**, *153*, 205–212. doi: 10.1159/000486975

14. Nanda, I.; Karl, E.; Griffin, D.K.; Schartl, M.; Schmid, M. Chromosome repatterning in three representative parrots (Psittaciformes) inferred from comparative chromosome painting. *Cytogenet. Genome Res.* **2007**, *117*, 43–53. doi: 10.1159/000103164
15. Furo, I.O.; Kretschmer, R.; O'Brien, P.C.M.; Ferguson-Smith, M.A.; de Oliveira, E.H.C. Chromosomal Diversity and Karyotype Evolution in South American Macaws (Psittaciformes, Psittacidae). *PLoS One* **2015**, *10*, e0130157. doi: 10.1371/journal.pone.0130157
16. Seibold-Torres, C.; Owens, E.; Chowdhary, R.; Ferguson-Smith, M.A.; Tizard, I.; Raudsepp, T. Comparative Cytogenetics of the Congo African Grey Parrot (*Psittacus erithacus*). *Cytogenet. Genome Res.* **2015**, *147*, 144–153. doi: 10.1159/000444136
17. Seabury, C.M.; Dowd, S.E.; Seabury, P.M.; Raudsepp, T.; Brightsmith, D.J.; Liboriussen, P.; Halley, Y.; Fisher, C.A.; Owens, E.; Viswanathan, G.; Tizard, I.R. A Multi-Platform Draft de novo Genome Assembly and Comparative Analysis for the Scarlet Macaw (*Ara macao*). *PLoS One* **2013**, *8*, e62415. doi: 10.1371/journal.pone.0062415
18. Furo, I.O.; Kretschmer, R.; O'Brien, P.C.M.; Pereira, J.C.; Garnero, A.D.V.; Gunski, R.J.; Ferguson-Smith, M.A.; de Oliveira, E.H.C. Chromosome painting in neotropical long and short-tailed parrots (Aves, Psittaciformes): phylogeny and proposal for a putative ancestral karyotype for tribe Arini. *Genes* **2018**, *9*, 491. doi: 10.3390/genes9100491
19. Furo, I.O.; Kretschmer, R.; O'Brien, P.C.M.; Pereira, J.; Garnero, A.D.V.; Gunski, R.J.; O'Connor, R.E.; Griffin, D.K.; Gomes, A.J.B.; Ferguson-Smith, M.A.; de Oliveira, E.H.C. Chromosomal evolution in the phylogenetic context in Neotropical Psittacidae with emphasis on a species with high karyotypic reorganization (*Myiopsitta monachus*). *Front. Genet.* **2020**, *11*, 721. doi: 10.3389/fgene.2020.00721
20. Ribas, T.F.A.; Pieczarka, J.C.; Griffin, D.K.; Kiazim, L.G.; Nagamachi, C.Y.; O'Brien, P.C.M.; Ferguson-Smith, M.A.; Yang, F.; Aleixo, A.; O'Connor, R.E. Analysis of multiple chromosomal rearrangements in the genome of *Willisornis vidua* using BAC-FISH and chromosome painting on a supposed conserved karyotype. *BMC Ecol. Evol.* **2021**, *21*, 34. doi: 10.1186/s12862-021-01768-y
